# Supplementary material
Source: Research Square preprint supplement (doi:10.21203/rs.3.rs-8691187/v1)
Supplement: Supplementary file 1 [file 3562fab277b0bce73e0e82ba.docx]

**Table S1.** Sequences of primers used for qRT-PCR in this study

| Item | Sequence | |
| --- | --- | --- |
| β-actin | Forward (5′-3′) | CATGTACGTTGCTATCCAGGC |
| Reverse (5′-3′) | CTCCTTAATGTCACGCACGAT |
| SLC7A11 | Forward (5′-3′) | TCTCCAAAGGAGGTTACCTGC |
| Reverse (5′-3′) | AGACTCCCCTCAGTAAAGTGAC |
| PTGS2 | Forward （5′-3′） | CTGGCGCTCAGCCATACAG |
| Reverse （5′-3′） | CGCACTTATACTGGTCAAATCCC |
