# Supplementary material
Source: Research Square preprint supplement (doi:10.21203/rs.3.rs-8691187/v1)
Supplement: Supplementary file 2 [file 87eb5d5d660d48892e9bbd4e.docx]

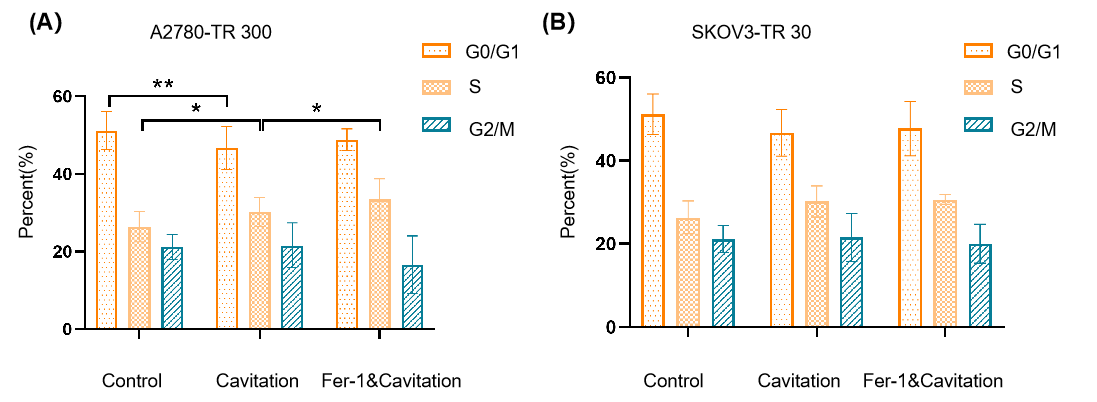


**Figure S1 Fer-1 mitigated the cell cycle alterations caused by ultrasound cavitation.**  Quantification of cell cycle distribution in A2780-TR300 cells (A) and SKOV3-TR30 cells (B) for three groups.
